# Supplementary material for: Malignant cerebral infarction after ChAdOx1 nCov-19 vaccination: a catastrophic variant of vaccine-induced immune thrombotic thrombocytopenia
Source: PubMed Central journal article supplement (PMC8329262; doi:10.1038/s41467-021-25010-x), 2021-08-02
Supplement: 41467_2021_25010_MOESM1_ESM.pdf [file 41467_2021_25010_MOESM1_ESM.pdf]

## Supplementary Information for

### **Malignant cerebral infarction, systemic venous thrombosis and thrombocytopenia after ChAdOx1 nCov vaccination: a possible catastrophic variant of vaccine induced thrombotic thrombocytopenia**

M. De Michele<sup>\*</sup>, M. Iacobucci, A. Chistolini, E. Nicolini, F. Pulcinelli, B. Cerbelli, E. Merenda, O.G. Schiavo, E. Sbardella, I. Berto, L. Petraglia, N. Caracciolo, M. Chiara, S. Truglia, D. Toni

\* Corresponding author. Email: [M.DeMichele@policlinicoumberto1.it](mailto:M.DeMichele@policlinicoumberto1.it)

#### **The PDF file includes:**

- |                           |        |
|---------------------------|--------|
| 1. Supplementary Figure 1 | page 2 |
| 2. Supplementary Figure 2 | page 3 |
| 3. Supplementary Table 1  | page 4 |

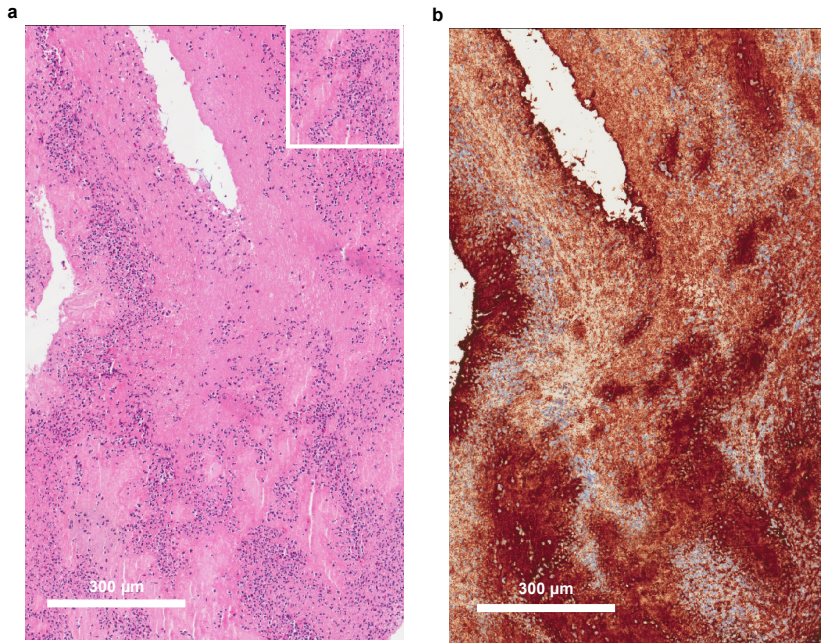

**Supplementary Figure 1. Microscopic view of the retrieved clot from patient 1, during first endovascular thrombectomy.**

**a.** Platelet-rich thrombus massively infiltrated by neutrophils. Morphologic features suggestive of Neutrophil DNA Extracellular Traps are present (insert). **b.** Immunohistochemistry for CD61 highlights the abundant presence of platelets. Immunohistochemical staining was performed three times using appropriate positive and negative controls with comparable results.

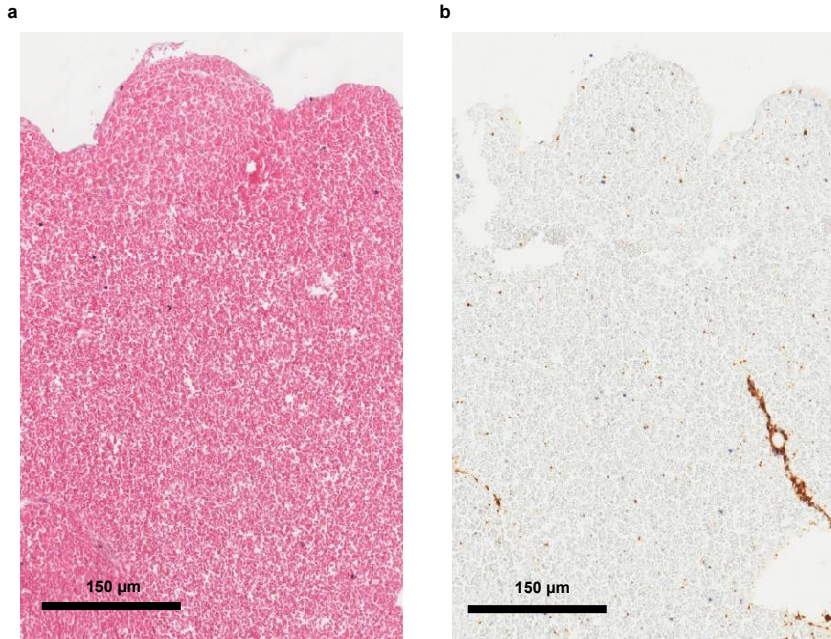

**Supplementary Figure 2. Microscopic view of the retrieved clot from patient 1, during second endovascular thrombectomy.**

**a.** Red blood cell-rich thrombus with scarce neutrophils. **b.** Immunohistochemistry for CD61 highlights very few platelets. Immunohistochemical staining was performed three times using appropriate positive and negative controls with comparable results.

**Supplementary Table 1. Blood examination parameters at baseline, 12 hours, 24 hours and 48 hours in patient 1 and patient 2.**

|                                        |                 | PATIENT 1 |          |          |          | PATIENT 2 |          |          |          |
|----------------------------------------|-----------------|-----------|----------|----------|----------|-----------|----------|----------|----------|
| Value                                  | Reference value | T0        | 12 hours | 24 hours | 48 hours | T0        | 12 hours | 24 hours | 48 hours |
| C-reactive protein (mg/dL)             | 0 - 0.5         | 12.13     | 7.79     | NA       | 4.61     | 2.05      | 3.66     | 7.06     | 9.90     |
| RBC (x10 <sup>6</sup> /μL)             | 3.5 - 5.1       | 4.45      | 3.8      | 3.55     | 3.54     | 4.41      | 4.18     | 4.11     | 3.46     |
| Hemoglobin (g/dL)                      | 12 - 16         | 13.9      | 12.1     | 10.9     | 11.4     | 14.1      | 13.3     | 12.9     | 10.8     |
| Hematocrit (%)                         | 32 - 47         | 39.7      | 33.8     | 30.8     | 31.3     | 40.9      | 37.1     | 36.9     | 31.5     |
| WBC (x10 <sup>3</sup> /μL)             | 4 - 10          | 6.08      | 6.98     | 9.59     | 7.01     | 8.8       | 6.96     | 9.59     | 6.06     |
| Neutrophils (x10 <sup>3</sup> /μL)     | 2.2 - 6.6       | 2.76      | 6.16     | 8.08     | 5.72     | 7.2       | 6.18     | 8.68     | 5.23     |
| Lymphocytes (x10 <sup>3</sup> /μL)     | 1 - 3.2         | 2.78      | 0.62     | 1.09     | 0.77     | 1         | 0.44     | 0.47     | 0.59     |
| Monocytes (x10 <sup>3</sup> /μL)       | 0.2 - 1         | 0.28      | 0.11     | 0.33     | 0.36     | 0.6       | 0.19     | 0.35     | 0.21     |
| Eosinophils (x10 <sup>3</sup> /μL)     | 0 - 0.8         | 0.12      | 0.03     | 0.01     | 0.06     | 0         | 0.1      | 0.02     | 0.01     |
| Basophils (x10 <sup>3</sup> /μL)       | 0 - 1.5         | 0.02      | 0        | 0.01     | 0.01     | 0         | 0.01     | 0.01     | 0.01     |
| Neutrophils (%)                        | 40 - 74         | 45.4      | 88.3     | 84.3     | 81.6     | 82        | 88.8     | 90.5     | 86.3     |
| Lymphocytes (%)                        | 19 - 48         | 45.8      | 8.9      | 11.4     | 11       | 10.9      | 6.3      | 4.9      | 9.7      |
| Monocytes (%)                          | 3.4 - 11        | 4.6       | 1.6      | 3.4      | 5.1      | 6.3       | 2.8      | 3.7      | 3.4      |
| Eosinophils (%)                        | 0 - 7           | 1.9       | 0.5      | 0.1      | 0.8      | 0.6       | 1.4      | 0.2      | 0.1      |
| Basophils (%)                          | 0 - 2           | 0.4       | 0        | 0.1      | 0.1      | 0.2       | 0.2      | 0.1      | 0.1      |
| Platelets count (x10 <sup>3</sup> /μL) | 150 - 450       | 44        | 78       | 54       | 23       | 133       | 97       | 95       | 66       |
| Reticulocyte index (%)                 | 0.5 - 2.5       | NA        | NA       | NA       | 2.8      | NA        | NA       | NA       | NA       |
| Reticulocyte count (x10)               | 31 - 82         | NA        | NA       | NA       | 96       | NA        | NA       | NA       | NA       |
| Aspartate aminotransferase (UI/L)      | 8 - 38          | 55        | 33       | NA       | 26       | 12.6      | 12       | 13       | 10       |
| Alanine aminotransferase (UI/L)        | 12 - 41         | 83        | 62       | NA       | 36       | 7.3       | 7        | 7        | 7        |
| γGlutamyltransferase (UI/L)            | 5 - 36          | 110       | 92       | NA       | 103      | 15.4      | 9        | 12       | 15       |
| Lactate dehydrogenase (UI/L)           | 135 - 225       | 212       | 193      | NA       | 256      | NA        | 196      | 189      | 138      |
| <b>Coagulation tests</b>               |                 |           |          |          |          |           |          |          |          |
|                                        |                 | PATIENT 1 |          |          |          | PATIENT 2 |          |          |          |
| Value                                  | Reference value | T0        | 12 hours | 24 hours | 48 hours | T0        | 12 hours | 24 hours | 48 hours |
| PT INR                                 | 0.8 - 1.2       | 1.16      | 1.19     | 1.22     | 1.17     | NA        | 1.04     | 1.16     | 1.18     |
| PTT Ratio                              | 0.8 - 1.2       | 0.83      | 0.84     | 0.86     | 0.83     | 0.99      | 0.85     | 1.17     | 0.94     |
| Fibrinogen (mg/dL)                     | 200 - 400       | 405       | 341      | 262      | 250      | NA        | 385      | 336      | 322      |
| D-DIMER (μg/L)                         | 0 - 550         | NA        | NA       | 4318     | >4318    | 5441      | NA       | 31646    | NA       |
| Antithrombin III (%)                   | 80 - 120        | NA        | NA       | NA       | 96       | NA        | NA       | 84       | NA       |
| Factor XIII (%)                        | 64 - 140        | NA        | NA       | 35.6     | NA       | NA        | NA       | NA       | NA       |

|                            |                        |                  |                 |                 |                 |                  |                 |                 |                 |
|----------------------------|------------------------|------------------|-----------------|-----------------|-----------------|------------------|-----------------|-----------------|-----------------|
| Factor VIII (%)            | 58 - 130               | NA               | NA              | 143.7           | NA              | NA               | NA              | 154             | NA              |
| C3 (mg/dL)                 | 90 - 180               | NA               | NA              | 139             | NA              | NA               | NA              | NA              | NA              |
| C4 (mg/dL)                 | 10 - 40                | NA               | NA              | 28.8            | NA              | NA               | NA              | NA              | NA              |
| VWF: RiCof (%)             | 41-124                 | NA               | NA              | 342             | NA              | NA               | NA              | 146             | NA              |
| VWF: Antigen (%)           | 41-130                 | NA               | NA              | 145             | NA              | NA               | NA              | 154             | NA              |
| <b>COVID 19 Testing</b>    |                        |                  |                 |                 |                 |                  |                 |                 |                 |
|                            |                        | <b>PATIENT 1</b> |                 |                 |                 | <b>PATIENT 2</b> |                 |                 |                 |
| <b>Value</b>               | <b>Reference value</b> | <b>T0</b>        | <b>12 hours</b> | <b>24 hours</b> | <b>48 hours</b> | <b>T0</b>        | <b>12 hours</b> | <b>24 hours</b> | <b>48 hours</b> |
| SARS-CoV-2 E Gene          |                        | ND               | -               | -               |                 | ND               | -               | -               |                 |
| SARS-CoV-2 N Gene          |                        | ND               | -               | -               |                 | ND               | -               | -               |                 |
| SARS-CoV-2 RdRp Gene       |                        | ND               | -               | -               |                 | ND               | -               | -               |                 |
| SARS-CoV-2 RdRp/N Gene     |                        | ND               | -               | -               |                 | ND               | -               | -               |                 |
| SARS-CoV-2 S Gene          |                        | ND               | -               | -               |                 | ND               | -               | -               |                 |
| Ab Anti-Sars-CoV-2 (AU/ml) | positive >15           | -                | .               | >400            | -               | -                | -               | <3.8            | -               |

T0= baseline; NA= Not assessed; ND= Not detected; RBC= Red blood cells; WBC= White blood cells; RiCof= Ristocetin cofactor.

Laboratory data from case 1 and 2 have been reported for the first 48 hours. Severe thrombocytopenia and D-Dimer increase are evident in both patients.

From day 6, patient 1 showed progressively increase of liver enzymes peaking on day 17: aspartate aminotransferase (AST) at 487 UI/L, alanine aminotransferase (ALT) at 640 UI/L and  $\gamma$ -glutamyltransferase (GGT) at 163 UI/L (with the upper limits of normal range at 38 UI/L, 41 UI/L and 36 UI/L, respectively). Liver dysfunction was secondary to the portal vein thrombosis.
